# Supplementary material for: Association between subjective tinnitus and cognitive performance: protocol for systematic review and meta-analysis
Source: PubMed Central journal article supplement (PMC6091911; doi:10.1136/bmjopen-2018-023700), 2018-08-13
Supplement: bmjopen-2018-023700.draft_revisions.pdf [file bmjopen-2018-023700.draft_revisions.pdf]

# BMJ Open

BMJ Open is committed to open peer review. As part of this commitment we make the peer review history of every article we publish publicly available.

When an article is published we post the peer reviewers' comments and the authors' responses online. We also post the versions of the paper that were used during peer review. These are the versions that the peer review comments apply to.

The versions of the paper that follow are the versions that were submitted during the peer review process. They are not the versions of record or the final published versions. They should not be cited or distributed as the published version of this manuscript.

BMJ Open is an open access journal and the full, final, typeset and author-corrected version of record of the manuscript is available on our site with no access controls, subscription charges or pay-per-view fees (<http://bmjopen.bmj.com>).

If you have any questions on BMJ Open's open peer review process please email [info.bmjopen@bmj.com](mailto:info.bmjopen@bmj.com)

# BMJ Open

## The association between subjective tinnitus and cognitive performance: protocol for systematic review and meta-analysis

|                               |                                                                                                                                                                                                                                                                                                                                                                                                                                                                                                                      |
|-------------------------------|----------------------------------------------------------------------------------------------------------------------------------------------------------------------------------------------------------------------------------------------------------------------------------------------------------------------------------------------------------------------------------------------------------------------------------------------------------------------------------------------------------------------|
| Journal:                      | <i>BMJ Open</i>                                                                                                                                                                                                                                                                                                                                                                                                                                                                                                      |
| Manuscript ID                 | bmjopen-2018-023700                                                                                                                                                                                                                                                                                                                                                                                                                                                                                                  |
| Article Type:                 | Protocol                                                                                                                                                                                                                                                                                                                                                                                                                                                                                                             |
| Date Submitted by the Author: | 19-Apr-2018                                                                                                                                                                                                                                                                                                                                                                                                                                                                                                          |
| Complete List of Authors:     | Clarke, Nathan; National Institute of Health Research Nottingham Biomedical Centre, Otology and Hearing Group; MRC Institute of Hearing Research<br>Akeroyd, Michael; MRC Institute of Hearing Research; University of Nottingham School of Medicine<br>Henshaw, Helen; University of Nottingham, School of Medicine; NIHR Nottingham Hearing Biomedical Research Unit, NIHR Nottingham Hearing Biomedical Research Unit<br>Hoare, Derek; University of Nottingham, NIHR Nottingham Hearing Biomedical Research Unit |
| Keywords:                     | Tinnitus, Cognition, Memory, Audiology < OTOLARYNGOLOGY, Attention, ENT                                                                                                                                                                                                                                                                                                                                                                                                                                              |
|                               |                                                                                                                                                                                                                                                                                                                                                                                                                                                                                                                      |

SCHOLARONE™  
Manuscripts

1  
2  
3 1 **The association between subjective tinnitus and cognitive performance:**  
4 **protocol for systematic review and meta-analysis**  
5  
6  
7 3

8 4 Nathan A Clarke <sup>1,2</sup>, Michael Akeroyd <sup>1</sup>, Helen Henshaw <sup>2</sup> & Derek J Hoare <sup>2</sup>  
9  
10 5

11 6 <sup>1</sup>. *Medical Research Council Institute of Hearing Research, School of Medicine, The*  
12 *University of Nottingham, University Park, Nottingham, UK*  
13  
14 7  
15 8

16  
17 9 <sup>2</sup>. *National Institute of Health Research Nottingham Biomedical Research Centre, Otology*  
18 *and Hearing Group, Division of Clinical Neuroscience, University of Nottingham,*  
19 *Nottingham, United Kingdom*  
20  
21  
22 11

23  
24  
25 12 Correspondence: Nathan Clarke. National Institute of Health Research Nottingham  
26  
27 13 Biomedical Research Centre, Otology and Hearing Group, Division of Clinical Neuroscience,  
28  
29 14 University of Nottingham, Nottingham, United Kingdom. E-mail:  
30  
31 15 [nathan.clarke@nottingham.ac.uk](mailto:nathan.clarke@nottingham.ac.uk)  
32  
33  
34 16

35 17 Nathan Andrew Clarke  <https://orcid.org/0000-0002-8636-1872>

36 18 Michael Akeroyd  <https://orcid.org/0000-0002-7182-9209>

37 19 Helen Henshaw  <https://orcid.org/0000-0002-0547-4403>

38 20 Derek James Hoare  <https://orcid.org/0000-0002-8768-1392>  
41  
42 21

43 22 **WORD COUNT: 1050 (excluding title page, abstract, references, figures**  
44 **and tables)**  
45  
46  
47 24  
48  
49 25  
50  
51 26  
52 27  
53 28  
54 29  
55 29  
56 30  
57  
58  
59  
60

## 31 **ABSTRACT**

### 32 **Introduction:**

33 Subjective tinnitus is very common and has a number of comorbid associations including depression,  
34 sleep disturbance and concentration difficulties. Concentration difficulties may be observable in  
35 people with tinnitus through poorer behavioural performance in tasks thought to measure specific  
36 cognitive domains such as attention and memory (i.e. cognitive performance). Several reviews have  
37 discussed the association between tinnitus and cognition, however, none to date have investigated the  
38 association between tinnitus and cognitive performance through meta-analysis. Furthermore, there has  
39 been little overlap between sets of studies that have been included in previous reviews, potentially  
40 contributing to the typically mixed findings that are reported.

### 41 **Methods and analysis:**

42 This systematic review aims to comprehensively review the literature and quantitatively synthesize  
43 relevant data to determine associations between subjective tinnitus and cognitive performance.  
44 Methods are reported according to Preferred Reporting Items for Systematic Reviews and Meta-  
45 Analyses Protocols (PRISMA-P). All study designs will be eligible for inclusion with no date  
46 restrictions on searches. Studies eligible for inclusion must contain adult participants ( $\geq 18$  years) with  
47 self-reported, subjective tinnitus and a behavioural measure of cognitive performance. Meta-analysis  
48 will be reported via correlation for the association between tinnitus and cognitive performance.

### 49 **Ethics and dissemination:**

50 No ethical issues are foreseen. Findings will be reported in a student thesis, at national and  
51 international ENT/audiology conferences and by peer-reviewed publication.

### 52 **Systematic review registration number:**

53 PROSPERO 2018 CRD42018085528.

### 55 **Strengths and limitations of this study**

- 56 • This systematic review and meta-analysis protocol poses a clearly formulated research  
57 question and methodology to investigate a common clinical complaint of tinnitus patients;  
58 peer-reviewed evidence to date will be synthesised.
- 59 • Grey literature and dissertation abstracts will not be included

## 61 **Introduction**

62 Subjective tinnitus is the experience of sound in the ears or head in the absence of an external source  
63 and is commonly considered a symptom of damage within the auditory system.<sup>1</sup> Most individuals  
64 who experience tinnitus do not find it bothersome but a significant proportion are disturbed by it,  
65 often reporting a variety of adverse comorbid associations including anxiety, depression, disturbed  
66 sleep, or concentration difficulties.<sup>2-4</sup> Concentration difficulties can be conceptualised as failures of

67 cognitive performance in various domains such as attention and memory<sup>5,6</sup> and previous research has  
 68 implicated tinnitus as impacting cognitive domains including executive functions, attention and  
 69 working memory.<sup>7-9</sup> Investigating the potential impact of tinnitus on cognitive performance is further  
 70 complicated by the strong associations that tinnitus shares with depression and anxiety, which can  
 71 independently negatively impact cognitive performance.<sup>4,10,11</sup>

72 Several reviews have explored the relationship between tinnitus and cognition.<sup>12-15</sup> We note  
 73 that all of these are narrative reviews; no review has quantitatively synthesised the literature  
 74 specifically concerning tinnitus and behaviourally measured cognitive performance. An overview of  
 75 previous reviews and their methodologies is provided in Table 1.

76 *Table 1. Overview of previous reviews investigating cognition and tinnitus*

| Study                        | Databases searched                      | Example search strategy provided                                                                                                                                                                                                        | Number of records retrieved during database search | Number of studies included in review | Synthesis of association between cognition and tinnitus                                                                                                                                                                                   |
|------------------------------|-----------------------------------------|-----------------------------------------------------------------------------------------------------------------------------------------------------------------------------------------------------------------------------------------|----------------------------------------------------|--------------------------------------|-------------------------------------------------------------------------------------------------------------------------------------------------------------------------------------------------------------------------------------------|
| Trevis et al. (2017)         | PsycINFO, MedLine                       | (1) tinnitus AND psych* (all fields), (2) tinnitus AND mood (all fields), (3) tinnitus AND depress* (all fields), (4) tinnitus AND anx* OR stress (all fields)                                                                          | 725                                                | 35                                   | Meta-analysis of 'psychological functioning' in tinnitus participants. Narrative review of association between 'cognitive functioning' (n = 16); i.e. behavioural cognitive task performance and chronic tinnitus, awareness and severity |
| Mohamad et al. (2016)        | PubMed                                  | (((((tinnitus[Title]) AND cogniti*[Title])) OR ((tinnitus[Title]) AND attention[Title])) OR ((tinnitus[Title]) AND memory[Title]))                                                                                                      | 65                                                 | 9                                    | Narrative review of 'behavioral research' addressing the impact of tinnitus and its severity of various aspects of cognitive performance in domains of working memory and attention.                                                      |
| Tegg-Quinn et al. (2016)     | PubMed, MedLine, CINAHL, SCOPUS, EMBASE | (tinnitus) and (cognition OR memory OR attention OR concentration OR cognitive function OR mental activity) NOT (infant OR child OR adolescent OR paediatric OR animal OR balance OR hyperacusis OR implant OR pharmaceutical OR drugs) | 2236                                               | 18                                   | Narrative review of behavioural cognitive tasks, electrophysiological correlates of cognition and self-reported cognitive function measures.                                                                                              |
| Andersson and McKenna (2006) | Not reported                            | Not reported                                                                                                                                                                                                                            | Not reported                                       | Not reported                         | Narrative review of 'cognitive deficits' (i.e. behavioural cognitive tasks), 'cognitive bias' and 'conscious appraisal of tinnitus'.                                                                                                      |

77  
 78  
 79 Andersson and McKenna<sup>12</sup> were the first to review the relationship between cognition and  
 80 tinnitus, detailing three separate but related lines of cognitive research. The strands of research  
 81 included neuropsychological studies involving attention, cognitive bias (concerning selective attention  
 82 and memory) and appraisal (i.e. conscious recollection) of tinnitus. Tegg-Quinn et al.<sup>13</sup> performed a  
 83 systematic review of all studies pertaining to the impact of tinnitus upon cognition in adults. The  
 84 review described studies that included both behavioural and electrophysiological measures and  
 85 concluded that tinnitus impairs cognition through impacting on executive control of attention.  
 86 Mohamad et al.<sup>14</sup> performed a narrative review of the behavioural evidence concerning the

1  
2  
3 87 consequences of tinnitus and its severity on cognition. They concluded that there was suggestive  
4 88 evidence for tinnitus being associated with poorer performance in behavioural tasks attempting to  
5 89 measure executive attention, selective attention and working memory. Trevis et al.<sup>15</sup> performed a  
6 90 systematic review and meta-analysis of psychological functioning in chronic tinnitus. The authors  
7 91 predominantly investigated the presence and severity of tinnitus in relation to emotional wellbeing  
8 92 through meta-analysis, while cognitive function (i.e. cognitive performance) was described through a  
9 93 narrative review. Of the recent reviews that discuss cognition through behavioural performance in  
10 94 tinnitus participants, there is a notable lack of overlap in the studies that met criteria for inclusion in  
11 95 the final reviews; e.g. Mohamad et al.<sup>14</sup> reviewed nine studies and Trevis et al.<sup>15</sup> reviewed a total of  
12 96 thirty-five studies (with sixteen of these concerning cognitive performance), however, only three  
13 97 studies were included in both reviews. Therefore, previous work has essentially investigated the  
14 98 association between tinnitus and cognitive performance with different datasets. Like any statistical  
15 99 technique, meta-analysis is only as robust as the data that is inputted. It is, therefore, essential to  
16 100 include as much relevant data as possible - through a comprehensive search strategy - to ensure that  
17 101 conclusions are based on all evidence for an effect of tinnitus on specific cognitive domains.

18 102 Tinnitus is a symptom of heterogeneous and often unknown aetiologies. It is, therefore,  
19 103 inherently difficult to define and specify within the context of a systematic review. Different inclusion  
20 104 criteria and working definitions of tinnitus are likely to significantly influence the records included  
21 105 within a review. For example, Trevis et al.<sup>15</sup> defined 'chronic tinnitus' as participants who had  
22 106 experienced tinnitus for at least one month. An alternative approach would be to not attempt to  
23 107 temporally specify a population, but rather investigate this variable through further quantitative  
24 108 analysis if feasible. With regards to domains of cognitive performance, the aforementioned reviews  
25 109 have implicated tinnitus as impacting executive attention, although the evidence is not conclusive:  
26 110 additional domains of cognitive performance are also potentially associated with tinnitus, including  
27 111 selective attention and working memory<sup>12-15</sup>. A promising approach to foster empirically valid insights  
28 112 into any association between cognition and subjective tinnitus is through evaluating and categorising  
29 113 tests of cognitive performance according to the theoretical constructs that they are thought to  
30 114 measure<sup>16</sup>. Any associations between categorised measures of cognitive performance and subjective  
31 115 tinnitus can then be subjected to meta-analysis in order to understand which cognitive domains are  
32 116 associated with tinnitus, as well as the best estimate of any such effect. To summarise, although  
33 117 several authors have reviewed associations between tinnitus and cognitive performance assessed  
34 118 through behavioural measures, these have been through narrative syntheses, discussing different sets  
35 119 of studies derived from different search strategies. A comprehensive, quantitative investigation of the  
36 120 association between tinnitus and cognitive performance, building on earlier efforts in this field and  
37 121 exploring the underlying theoretical domains of cognition involved, is therefore both necessary and  
38 122 timely.

1  
2  
3 123 The primary aim of this work is to comprehensively review the literature and synthesize  
4 124 relevant data to determine the associations between self-reported subjective tinnitus and cognitive task  
5 125 performance in adults. If possible, a secondary examination of patient characteristics (e.g. age or  
6 126 gender) or commonly used patient-reported outcomes (e.g. depression or anxiety) and their influence  
7 127 on any association between subjective tinnitus and cognitive performance will also be conducted.  
8  
9  
10 128  
11  
12 129

### 13 130 **Methods and Analysis**

14 131 The methodology of this review is reported in accordance with the Preferred Reporting Items for  
15 132 Systematic Reviews and Meta-Analysis Protocols (PRISMA-P) checklist<sup>17</sup>. Specified roles of named  
16 133 authors are identified throughout the review protocol.  
17  
18  
19 134

#### 20 21 135 **Eligibility criteria**

22 136 Only published or in-press, peer-reviewed journal articles will be considered. Articles that are not  
23 137 written in English or have no English language translation available will be excluded as the review  
24 138 team does not have resource available to support translation. No date restriction will be applied.  
25  
26  
27 139

28 140 Review inclusion criteria are specified according to Participant, Intervention (or Interest),  
29 141 Comparator, Outcome and Setting (PICOS) characteristics.

30  
31 142  
32  
33 143 *Participants:* Studies including adults ( $\geq 18$  years) with subjective tinnitus. Studies that include both  
34 144 children ( $< 18$  years) and adults will be excluded, unless the adult data are reported separately.

35  
36 145  
37 146 *Intervention/Interest:* Subjective tinnitus (via self-report, tinnitus severity scale, item or established  
38 147 tinnitus questionnaires).

39  
40 148  
41  
42 149 *Comparator:* A minimum of one established measure of cognitive performance (behavioural or self-  
43 150 report).

44  
45 151  
46 152 *Outcome measures:* An association between tinnitus and cognitive performance. Where available,  
47 153 data for associations between subjective tinnitus and additional potential moderator variables will be  
48 154 extracted, such as measures of anxiety or depression.  
49  
50  
51 155

52 156 *Study design:* Any type of study design and setting will be considered.  
53  
54 157

#### 55 158 **Information Sources and Search strategy**

1  
2  
3 159 A systematic search strategy will be employed to identify completed, peer-reviewed journal articles  
4 160 from the following bibliographic databases: MEDLINE (via Ovid SP), EMBASE (via Ovid SP),  
5 161 PsycINFO (via Ovid SP), ASSIA (via ProQuest), CINAHL (via EBSCO Host), Scopus, PubMed, and  
6 162 Web of Science (Science and Social Science Citation Index). Searches will be performed during  
7  
8 163 01/02/18 – 01/03/18.

9  
10 164 The search terms to be used in this systematic review were identified using free text,  
11 165 controlled vocabularies (i.e. Medical Subject Headings - MeSH and CINAHL Headings), literature  
12 166 review, expert opinion, and scrutiny of test search results. The following search strategy will be used  
13 167 for PubMed, which will then be adapted for other databases to be searched:

14  
15 168 (“tinnitus”[MeSH] OR “tinnitus”[tiab] OR “phantom sound\*”[tiab] OR “ringing”[tiab] OR  
16 169 “buzzing”[tiab]) AND (“cognition”[MeSH] OR “cogniti\*”[tiab] OR “memory”[tiab] or  
17 170 “attention\*”[tiab] OR “executive”[tiab])  
18  
19  
20  
21  
22

## 23 172 **Data management**

24 173 NAC will be responsible for data management. Covidence online systematic review software  
25 174 (<https://www.covidence.org>) will be used for article screening and data management throughout the  
26 175 review. All articles identified through the search process will be recorded digitally and will be  
27 176 trackable through the data screening and extraction processes. Articles excluded at the full text  
28 177 screening stage will have justification for exclusion noted. Included articles will be assigned a unique  
29 178 study identification code, enabling it to be linked to its corresponding full text and data collection  
30 179 sheet.  
31  
32  
33  
34  
35

## 36 181 **Article selection process**

37 182 NAC, DH, and MA will independently screen titles and abstracts of records retrieved from searches  
38 183 such that all records are independently screened by two reviewers. Records that meet the specified  
39 184 inclusion criteria will then be taken forward to full text screening, as well as records where there is too  
40 185 little information available to make a decision to exclude. All full texts selected will be independently  
41 186 screened by two reviewers who will resolve any discrepancies in which records are included. Where  
42 187 discrepancies for inclusion are not resolved by the two reviewers, a third reviewer will adjudicate. If  
43 188 necessary, study authors will be contacted to request additional information that may help ascertain  
44 189 suitability for inclusion.  
45  
46  
47  
48  
49  
50

## 51 191 **Data extraction process**

52 192 Data extraction will be performed using a customised form via Covidence. Relevant guidance notes  
53 193 will be created and disseminated to review team members by NAC prior to commencement. The data  
54 194 form and guidance notes will be piloted by NAC and HH. All included records will be subject to data  
55  
56  
57  
58  
59  
60



195 extraction. Data from each included record will be extracted independently by two reviewers and the  
196 results compared. Any disagreements arising will be resolved through discussion or the involvement  
197 of a third reviewer.

198

#### 199 **Data items**

200 The data collection form will include various fields corresponding to study type, population, reported  
201 effect size, and any other relevant study findings. Study authors will be contacted if there are relevant  
202 missing data. Data will be approximated from figures for instances where it can only be estimated,  
203 using software such as WebPlotDigitizer (<http://arohatgi.info/WebPlotDigitizer/app/>). Disagreements  
204 regarding numerical data extracted from figures will be discussed by investigators and/or resolved by  
205 averaging.

206

#### 207 **Risk of bias in individual studies**

208 NAC, HH, and DH (two reviewers per record) will independently assess the risk of bias using  
209 relevant items adapted from the Critical Appraisal Skills Programme (CASP) Case Control Checklist  
210 (<https://casp-uk.net/casp-tools-checklists/>).

211

#### 212 **Data synthesis**

213 The effect of interest is the association between subjective tinnitus and measures of cognitive  
214 performance expressed as correlation. Where possible, results not expressed as correlations (e.g. mean  
215 differences between groups) will be calculated as appropriate correlations, such as point-biserial or  
216 polyserial correlation coefficients.<sup>18</sup> Bias corrections will be applied to all derived correlation  
217 coefficients prior to pooling.<sup>19</sup> Where possible, missing effect sizes will be calculated from reported  
218 test statistics such as standard deviations or t-values<sup>18</sup>. Narrative synthesis will be undertaken for  
219 records where appropriate effect sizes cannot be obtained.

220

#### 221 **Assessment of heterogeneity**

222 The ratio of observed variation to within-study variance will be assessed with the Q-statistic, used to  
223 test the null hypothesis of homogeneity of effect sizes. The  $I^2$  statistic will provide a further index of  
224 heterogeneity across studies. If the apparent heterogeneity across studies exceeds 50%, potential  
225 causes of heterogeneity will be explored through subgroup analysis. The Tau-squared statistic will  
226 also be used to assess the amount of heterogeneity where a random-effects model is fitted to the data.  
227 A Baujat plot will be used as a graphical means of identifying studies that contribute excessively to  
228 any observed heterogeneity and also provide insight into potential moderating variables that  
229 contribute to heterogeneity across studies<sup>20</sup>.

230

### 231 **Subgroup analyses**

232 Potential contributors to heterogeneity across studies will be explored through subgroup analysis (i.e.  
233 sensitivity analyses, moderator analysis or meta-regression). Variables of potential interest for  
234 subgroup analyses include participant age, gender, presence of hearing impairment and presence of  
235 anxiety or depression, or study design aspects, such as inclusion of a control group.

236

237

### 238 **Assessment of reporting bias**

239 The influence of reporting bias through potentially unpublished results (i.e. publication bias) will be  
240 explored via funnel plots, rank correlation test and/or Egger's regression test.

241

242

### 243 **Ethics and dissemination**

244 No ethical issues are foreseen in this systematic review. Reports will be guided by the Preferred  
245 Reporting Items for Systematic Reviews and Meta-Analysis guidelines<sup>21</sup>. Various dissemination  
246 strategies will be employed, that will likely include: journal article and PhD thesis (NC) made  
247 available via an institutional repository, results being reported at national and international academic  
248 conferences, and public and patient engagement (e.g. articles written for relevant non-specialist  
249 audiences).

250

251

### 252 **Summary**

253 A protocol is described for a -systematic review and meta-analysis to determine a best estimate of the  
254 association between subjective tinnitus and cognitive performance in adults. To date, no review has  
255 comprehensively explored the veracity of an association through application of quantitative analyses  
256 of all available peer-reviewed data. The outlined approach will facilitate an understanding of the  
257 potential impact of tinnitus upon cognition, underpinned by relevant cognitive theory. An increased  
258 understanding of the relationship between subjective tinnitus and cognitive performance will  
259 eventually improve tinnitus sub-typing and inform therapeutic methods<sup>22-25</sup> for example, it may be  
260 possible to deliver cognitive training paradigms in a targeted manner.

261

### 262 **Acknowledgements**

263 Thanks to Oliver Zobay for statistical advice.

264

1  
2  
3 265 NAC is supported by a Medical Research Council studentship.  
4 266 MA is supported by the Medical Research Council (grant number MC\_UU\_00010/3).  
5  
6 267 HH and DJH are funded by the National Institute for Health Research (NIHR) Biomedical Research  
7 268 Centre programme. The views expressed are those of the authors and not necessarily those of the  
8  
9 269 NIHR, the NHS, or the Department of Health and Social Care.

10 270

11  
12 271 **References**

- 13  
14 272 1. Sedley W, Friston KJ, Gander PE, *et al.* An Integrative Tinnitus Model Based on Sensory  
15 273 Precision. *Trends Neurosci* 2016;**39**:799–812.
- 16  
17  
18 274 2. Tyler RS, Baker LJ. Difficulties experienced by tinnitus sufferers. *J Speech Hear Disord*  
19 275 1983;**48**:150–4.
- 20  
21  
22 276 3. Andersson G, Lyttkens L, Larsen HC. Distinguishing levels of tinnitus distress. *Clin*  
23 277 *Otolaryngol Allied Sci* 1999;**24**:404–10.
- 24  
25 278 4. Bhatt JM, Bhattacharyya N, Lin HW. Relationships between tinnitus and the prevalence of  
26 279 anxiety and depression. *Laryngoscope* 2017;**127**:466–9.
- 27  
28  
29 280 5. Petersen SE, Posner MI. The attention system of the human brain: 20 years after. *Annu Rev*  
30 281 *Neurosci* 2012;**35**:73–89.
- 31  
32  
33 282 6. Baddeley A. Working memory. *Curr Biol* 2010;**20**:R136–40.
- 34  
35 283 7. Hallam RS, McKenna L, Shurlock L. Tinnitus impairs cognitive efficiency. *Int J Audiol*  
36 284 2004;**43**:218–26.
- 37  
38  
39 285 8. Rossiter S, Stevens C, Walker G. Tinnitus and its effect on working memory and attention. *J*  
40 286 *Speech Lang Hear Res* 2006;**49**:150–60.
- 41  
42  
43 287 9. Heeren A, Maurage P, Perrot H, *et al.* Tinnitus specifically alters the top-down executive  
44 288 control sub-component of attention: evidence from the Attention Network Task. *Behav Brain*  
45 289 *Res* 2014;**269**:147–54.
- 46  
47  
48 290 10. Robinson OJ, Vytal K, Cornwell BR, *et al.* The impact of anxiety upon cognition:  
49 291 perspectives from human threat of shock studies. *Front Hum Neurosci* 2013;**7**:203.
- 50  
51  
52 292 11. Lee RSC, Hermens DF, Porter MA, *et al.* A meta-analysis of cognitive deficits in first-  
53 293 episode Major Depressive Disorder. *J Affect Disord* 2012;**140**:113–24.
- 54  
55  
56  
57  
58  
59  
60

- 1  
2  
3 294 12. Andersson G, McKenna L. The role of cognition in tinnitus. *Acta Otolaryngol Suppl*  
4 295 2006;:39–43.  
5  
6 296 13. Mohamad N, Hoare DJ, Hall DA. The consequences of tinnitus and tinnitus severity on  
7 297 cognition: A review of the behavioural evidence. *Hear Res* 2016;**332**:199–209.  
8  
9 298 14. Tegg-Quinn S, Bennett RJ, Eikelboom RH, *et al*. The impact of tinnitus upon cognition in  
10 299 adults: A systematic review. *Int J Audiol* 2016;**55**:533–40.  
11  
12 300 15. Trevis KJ, McLachlan NM, Wilson SJ. A systematic review and meta-analysis of  
13 301 psychological functioning in chronic tinnitus. *Clin Psychol Rev* Published Online First: 30  
14 302 December 2017. doi:10.1016/j.cpr.2017.12.006  
15  
16 303 16. Dryden A, Allen HA, Henshaw H, *et al*. The Association Between Cognitive Performance  
17 304 and Speech-in-Noise Perception for Adult Listeners: A Systematic Literature Review and  
18 305 Meta-Analysis. *Trends in Hearing* Published Online First: 14 December 2017.  
19 306 doi:10.1177/2331216517744675  
20  
21 307 17. Shamseer L, Moher D, Clarke M, *et al*. Preferred reporting items for systematic review and  
22 308 meta-analysis protocols (PRISMA-P) 2015: elaboration and explanation. *BMJ*  
23 309 2015;**349**:g7647.  
24  
25 310 18. Lipsey MW, Wilson DB. *Practical Meta-Analysis*. SAGE Publications 2000.  
26  
27 311 19. Hunter JE, Schmidt FL. *Methods of Meta-Analysis: Correcting Error and Bias in Research*  
28 312 *Findings*. SAGE 2004.  
29  
30 313 20. Baujat B, Mahé C, Pignon J-P, *et al*. A graphical method for exploring heterogeneity in meta-  
31 314 analyses: application to a meta-analysis of 65 trials. *Stat Med* 2002;**21**:2641–52.  
32  
33 315 21. Moher D, Liberati A, Tetzlaff J, *et al*. Preferred reporting items for systematic reviews and  
34 316 meta-analyses: the PRISMA statement. *PLoS Med* 2009;**6**:e1000097.  
35  
36 317 22. Hoare DJ, Stacey PC, Hall DA. The efficacy of auditory perceptual training for tinnitus: a  
37 318 systematic review. *Ann Behav Med* 2010;**40**:313–24.  
38  
39 319 23. Baune BT, Renger L. Pharmacological and non-pharmacological interventions to improve  
40 320 cognitive dysfunction and functional ability in clinical depression--a systematic review.  
41 321 *Psychiatry Res* 2014;**219**:25–50.  
42  
43 322 24. Ferguson M, Henshaw H. How Does Auditory Training Work? Joined-Up Thinking and  
44 323 Listening. *Semin Hear* 2015;**36**:237–49.  
45  
46  
47  
48  
49  
50  
51  
52  
53  
54  
55  
56  
57  
58  
59  
60

1  
2  
3  
4  
5  
6  
7  
8  
9  
10  
11  
12  
13  
14  
15  
16  
17  
18  
19  
20  
21  
22  
23  
24  
25  
26  
27  
28  
29  
30  
31  
32  
33  
34  
35  
36  
37  
38  
39  
40  
41  
42  
43  
44  
45  
46  
47  
48  
49  
50  
51  
52  
53  
54  
55  
56  
57  
58  
59  
60

324 25. Barrett DJK, Pilling M. Evaluating the Precision of Auditory Sensory Memory as an Index  
325 Intrusion in Tinnitus. *Ear Hear* 2017;**38**:262–5.

326 NAC is the guarantor of the review (CRD42018085528). NAC led on the development of all sections  
327 of the review protocol. DH, HH & MA read, developed and provided feedback for all sections of the  
328 review protocol and approved the final manuscript.

329

For peer review only

## PRISMA-P 2015 Checklist

This checklist has been adapted for use with protocol submissions to *Systematic Reviews* from Table 3 in Moher D et al: Preferred reporting items for systematic review and meta-analysis protocols (PRISMA-P) 2015 statement. *Systematic Reviews* 2015 4:1

| Section/topic                     | #  | Checklist item                                                                                                                                                                                  | Information reported                |                          | Line number(s)   |
|-----------------------------------|----|-------------------------------------------------------------------------------------------------------------------------------------------------------------------------------------------------|-------------------------------------|--------------------------|------------------|
|                                   |    |                                                                                                                                                                                                 | Yes                                 | No                       |                  |
| <b>ADMINISTRATIVE INFORMATION</b> |    |                                                                                                                                                                                                 |                                     |                          |                  |
| <b>Title</b>                      |    |                                                                                                                                                                                                 |                                     |                          |                  |
| Identification                    | 1a | Identify the report as a protocol of a systematic review                                                                                                                                        | <input checked="" type="checkbox"/> | <input type="checkbox"/> | 1                |
| Update                            | 1b | If the protocol is for an update of a previous systematic review, identify as such                                                                                                              | <input type="checkbox"/>            | <input type="checkbox"/> | N/A              |
| <b>Registration</b>               | 2  | If registered, provide the name of the registry (e.g., PROSPERO) and registration number in the Abstract                                                                                        | <input checked="" type="checkbox"/> | <input type="checkbox"/> | 53               |
| <b>Authors</b>                    |    |                                                                                                                                                                                                 |                                     |                          |                  |
| Contact                           | 3a | Provide name, institutional affiliation, and e-mail address of all protocol authors; provide physical mailing address of corresponding author                                                   | <input checked="" type="checkbox"/> | <input type="checkbox"/> | 6-15             |
| Contributions                     | 3b | Describe contributions of protocol authors and identify the guarantor of the review                                                                                                             | <input checked="" type="checkbox"/> | <input type="checkbox"/> | 325              |
| <b>Amendments</b>                 | 4  | If the protocol represents an amendment of a previously completed or published protocol, identify as such and list changes; otherwise, state plan for documenting important protocol amendments | <input type="checkbox"/>            | <input type="checkbox"/> | N/A              |
| <b>Support</b>                    |    |                                                                                                                                                                                                 |                                     |                          |                  |
| Sources                           | 5a | Indicate sources of financial or other support for the review                                                                                                                                   | <input checked="" type="checkbox"/> | <input type="checkbox"/> | 266-270          |
| Sponsor                           | 5b | Provide name for the review funder and/or sponsor                                                                                                                                               | <input checked="" type="checkbox"/> | <input type="checkbox"/> | 266-270          |
| Role of sponsor/funder            | 5c | Describe roles of funder(s), sponsor(s), and/or institution(s), if any, in developing the protocol                                                                                              | <input checked="" type="checkbox"/> | <input type="checkbox"/> | 266-270          |
| <b>INTRODUCTION</b>               |    |                                                                                                                                                                                                 |                                     |                          |                  |
| <b>Rationale</b>                  | 6  | Describe the rationale for the review in the context of what is already known                                                                                                                   | <input checked="" type="checkbox"/> | <input type="checkbox"/> | 33-40, 62-127    |
| <b>Objectives</b>                 | 7  | Provide an explicit statement of the question(s) the review will address with reference to                                                                                                      | <input checked="" type="checkbox"/> | <input type="checkbox"/> | 128-132, 147-159 |

| Section/topic                             | #   | Checklist item                                                                                                                                                                                                                              | Information reported                |                          | Line number(s)   |
|-------------------------------------------|-----|---------------------------------------------------------------------------------------------------------------------------------------------------------------------------------------------------------------------------------------------|-------------------------------------|--------------------------|------------------|
|                                           |     |                                                                                                                                                                                                                                             | Yes                                 | No                       |                  |
|                                           |     | participants, interventions, comparators, and outcomes (PICO)                                                                                                                                                                               |                                     |                          |                  |
| <b>METHODS</b>                            |     |                                                                                                                                                                                                                                             |                                     |                          |                  |
| <b>Eligibility criteria</b>               | 8   | Specify the study characteristics (e.g., PICO, study design, setting, time frame) and report characteristics (e.g., years considered, language, publication status) to be used as criteria for eligibility for the review                   | <input checked="" type="checkbox"/> | <input type="checkbox"/> | 141-159          |
| <b>Information sources</b>                | 9   | Describe all intended information sources (e.g., electronic databases, contact with study authors, trial registers, or other grey literature sources) with planned dates of coverage                                                        | <input checked="" type="checkbox"/> | <input type="checkbox"/> | 162-165          |
| <b>Search strategy</b>                    | 10  | Present draft of search strategy to be used for at least one electronic database, including planned limits, such that it could be repeated                                                                                                  | <input checked="" type="checkbox"/> | <input type="checkbox"/> | 170-172          |
| <b>STUDY RECORDS</b>                      |     |                                                                                                                                                                                                                                             |                                     |                          |                  |
| Data management                           | 11a | Describe the mechanism(s) that will be used to manage records and data throughout the review                                                                                                                                                | <input checked="" type="checkbox"/> | <input type="checkbox"/> | 175-181          |
| Selection process                         | 11b | State the process that will be used for selecting studies (e.g., two independent reviewers) through each phase of the review (i.e., screening, eligibility, and inclusion in meta-analysis)                                                 | <input checked="" type="checkbox"/> | <input type="checkbox"/> | 184-191          |
| Data collection process                   | 11c | Describe planned method of extracting data from reports (e.g., piloting forms, done independently, in duplicate), any processes for obtaining and confirming data from investigators                                                        | <input checked="" type="checkbox"/> | <input type="checkbox"/> | 194-199          |
| <b>Data items</b>                         | 12  | List and define all variables for which data will be sought (e.g., PICO items, funding sources), any pre-planned data assumptions and simplifications                                                                                       | <input checked="" type="checkbox"/> | <input type="checkbox"/> | 202-207, 235-237 |
| <b>Outcomes and prioritization</b>        | 13  | List and define all outcomes for which data will be sought, including prioritization of main and additional outcomes, with rationale                                                                                                        | <input checked="" type="checkbox"/> | <input type="checkbox"/> | 215-221, 234-237 |
| <b>Risk of bias in individual studies</b> | 14  | Describe anticipated methods for assessing risk of bias of individual studies, including whether this will be done at the outcome or study level, or both; state how this information will be used in data synthesis                        | <input checked="" type="checkbox"/> | <input type="checkbox"/> | 209-212, 239-241 |
| <b>DATA</b>                               |     |                                                                                                                                                                                                                                             |                                     |                          |                  |
| <b>Synthesis</b>                          | 15a | Describe criteria under which study data will be quantitatively synthesized                                                                                                                                                                 | <input checked="" type="checkbox"/> | <input type="checkbox"/> | 226              |
|                                           | 15b | If data are appropriate for quantitative synthesis, describe planned summary measures, methods of handling data, and methods of combining data from studies, including any planned exploration of consistency (e.g., $I^2$ , Kendall's tau) | <input checked="" type="checkbox"/> | <input type="checkbox"/> | 215-221, 224-229 |
|                                           | 15c | Describe any proposed additional analyses (e.g., sensitivity or subgroup analyses, meta-                                                                                                                                                    | <input checked="" type="checkbox"/> | <input type="checkbox"/> | 233-237          |

| Section/topic                            | #   | Checklist item                                                                                                              | Information reported                |                          | Line number(s) |
|------------------------------------------|-----|-----------------------------------------------------------------------------------------------------------------------------|-------------------------------------|--------------------------|----------------|
|                                          |     |                                                                                                                             | Yes                                 | No                       |                |
|                                          |     | regression)                                                                                                                 |                                     |                          |                |
|                                          | 15d | If quantitative synthesis is not appropriate, describe the type of summary planned                                          | <input checked="" type="checkbox"/> | <input type="checkbox"/> | 221-222        |
| <b>Meta-bias(es)</b>                     | 16  | Specify any planned assessment of meta-bias(es) (e.g., publication bias across studies, selective reporting within studies) | <input checked="" type="checkbox"/> | <input type="checkbox"/> | 240-242        |
| <b>Confidence in cumulative evidence</b> | 17  | Describe how the strength of the body of evidence will be assessed (e.g., GRADE)                                            | <input checked="" type="checkbox"/> | <input type="checkbox"/> | 210-212        |



# BMJ Open

## The association between subjective tinnitus and cognitive performance: protocol for systematic review and meta-analysis

|                                 |                                                                                                                                                                                                                                                                                                                                                                                                                                                                                                                      |
|---------------------------------|----------------------------------------------------------------------------------------------------------------------------------------------------------------------------------------------------------------------------------------------------------------------------------------------------------------------------------------------------------------------------------------------------------------------------------------------------------------------------------------------------------------------|
| Journal:                        | <i>BMJ Open</i>                                                                                                                                                                                                                                                                                                                                                                                                                                                                                                      |
| Manuscript ID                   | bmjopen-2018-023700.R1                                                                                                                                                                                                                                                                                                                                                                                                                                                                                               |
| Article Type:                   | Protocol                                                                                                                                                                                                                                                                                                                                                                                                                                                                                                             |
| Date Submitted by the Author:   | 03-Jul-2018                                                                                                                                                                                                                                                                                                                                                                                                                                                                                                          |
| Complete List of Authors:       | Clarke, Nathan; National Institute of Health Research Nottingham Biomedical Centre, Otology and Hearing Group; MRC Institute of Hearing Research<br>Akeroyd, Michael; MRC Institute of Hearing Research; University of Nottingham School of Medicine<br>Henshaw, Helen; University of Nottingham, School of Medicine; NIHR Nottingham Hearing Biomedical Research Unit, NIHR Nottingham Hearing Biomedical Research Unit<br>Hoare, Derek; University of Nottingham, NIHR Nottingham Hearing Biomedical Research Unit |
| <b>Primary Subject Heading</b>: | Ear, nose and throat/otolaryngology                                                                                                                                                                                                                                                                                                                                                                                                                                                                                  |
| Secondary Subject Heading:      | Ear, nose and throat/otolaryngology                                                                                                                                                                                                                                                                                                                                                                                                                                                                                  |
| Keywords:                       | Tinnitus, Cognition, Memory, Audiology < OTOLARYNGOLOGY, Attention, ENT                                                                                                                                                                                                                                                                                                                                                                                                                                              |
|                                 |                                                                                                                                                                                                                                                                                                                                                                                                                                                                                                                      |

SCHOLARONE™  
Manuscripts

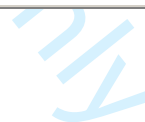

1  
2  
3 **1 The association between subjective tinnitus and cognitive performance:**  
4 **2 protocol for systematic review and meta-analysis**  
5  
6  
7

8  
9 4 Nathan A. Clarke <sup>1,2,3</sup>, Michael A. Akeroyd <sup>1,3</sup>, Helen Henshaw <sup>2</sup> & Derek J.  
10  
11 5 Hoare <sup>2</sup>  
12

13  
14 7 <sup>1</sup>. *Medical Research Council Institute of Hearing Research, School of Medicine, The*  
15  
16 8 *University of Nottingham, University Park, Nottingham, UK*

17  
18 9 <sup>2</sup>. *National Institute of Health Research Nottingham Biomedical Research Centre,*  
19

20  
21 10 <sup>3</sup>. *Hearing Sciences, Division of Clinical Neurosciences, School of Medicine, The University*  
22  
23 11 *of Nottingham, University Park, Nottingham UK*

24  
25  
26 12 Correspondence: Nathan Clarke. National Institute of Health Research Nottingham

27  
28 13 Biomedical Research Centre, Otology and Hearing Group, Division of Clinical Neuroscience,

29  
30 14 University of Nottingham, Nottingham, United Kingdom. E-mail:

31  
32 15 [nathan.clarke@nottingham.ac.uk](mailto:nathan.clarke@nottingham.ac.uk)  
33  
34

35  
36 16  
37 17 Nathan Andrew Clarke <https://orcid.org/0000-0002-8636-1872>

38 18 Michael Akeroyd <https://orcid.org/0000-0002-7182-9209>

39 19 Helen Henshaw <https://orcid.org/0000-0002-0547-4403>

40 20 Derek James Hoare <https://orcid.org/0000-0002-8768-1392>  
41  
42  
43

44 22 **WORD COUNT: 1373 (excluding title page, abstract, references, figures**  
45 **23 and tables)**  
46  
47  
48  
49  
50  
51  
52  
53  
54  
55  
56  
57  
58  
59  
60

1  
2  
3 30 **ABSTRACT**

4 31 **Introduction:**

5 32 Subjective tinnitus is very common and has a number of comorbid associations including depression,  
6 33 sleep disturbance and concentration difficulties. Concentration difficulties may be observable in  
7 34 people with tinnitus through poorer behavioural performance in tasks thought to measure specific  
8 35 cognitive domains such as attention and memory (i.e. cognitive performance). Several reviews have  
9 36 discussed the association between tinnitus and cognition, however, none to date have investigated the  
10 37 association between tinnitus and cognitive performance through meta-analysis with reference to an  
11 38 established theoretical taxonomy. Furthermore, there has been little overlap between sets of studies  
12 39 that have been included in previous reviews, potentially contributing to the typically mixed findings  
13 40 that are reported.

14 41 **Methods and analysis:**

15 42 This systematic review aims to comprehensively review the literature using an established theoretical  
16 43 taxonomy and quantitatively synthesize relevant data to determine associations between subjective  
17 44 tinnitus and cognitive performance. Methods are reported according to Preferred Reporting Items for  
18 45 Systematic Reviews and Meta-Analyses Protocols (PRISMA-P). All study designs will be eligible for  
19 46 inclusion with no date restrictions on searches. Studies eligible for inclusion must contain adult  
20 47 participants ( $\geq 18$  years) with subjective tinnitus and a behavioural measure of cognitive performance.  
21 48 Meta-analysis will be reported via correlation for the association between tinnitus and cognitive  
22 49 performance.

23 50 **Ethics and dissemination:**

24 51 No ethical issues are foreseen. Findings will be reported in a student thesis, at national and  
25 52 international ENT/audiology conferences and by peer-reviewed publication.

26 53 **Systematic review registration number:**

27 54 PROSPERO 2018 CRD42018085528.

28 55 **Funding statement:**

29 56 NAC is supported by a Medical Research Council studentship.

30 57 MAA is supported by the Medical Research Council (grant number MC\_UU\_00010/3).

31 58 HH and DJH are funded by the National Institute for Health Research (NIHR) Biomedical Research  
32 59 Centre programme. The views expressed are those of the authors and not necessarily those of the  
33 60 NIHR, the NHS, or the Department of Health and Social Care.

34 61 Contributors: NAC led on the development of all sections of the review protocol. DJH, HH & MAA  
35 62 developed and provided feedback for all sections of the review protocol and approved the final  
36 63 manuscript.

37 64 Competing interests: None declared.

38 65  
39 66

67

**68 Strengths and limitations of this study**

- 69 • This systematic review and meta-analysis protocol poses a clearly formulated research  
70 question and methodology to investigate a common clinical complaint of tinnitus patients;  
71 peer-reviewed evidence to date will be synthesised.
- 72 • This protocol details a comprehensive quantitative synthesis and inclusion of potential *a*  
73 *priori* moderator variables
- 74 • Synthesis will be clearly structured according to an established cognitive theoretical  
75 framework
- 76 • Grey literature and dissertation abstracts will not be included

**77 Introduction**

78 Tinnitus refers to the common experience of sound in the ears or head in the absence of an external  
79 source. It is commonly considered a symptom of damage within the auditory system [1]. Objective  
80 tinnitus involves sound with a known, non-central aetiology such as vascular abnormalities; it may be  
81 detected by an observer through auscultation. Objective tinnitus may be treated once the source of the  
82 aetiology has been identified and is therefore not of primary interest within this review [2]. Subjective  
83 tinnitus (hereafter discussed but simply referred to as ‘tinnitus’) involves sound of unknown  
84 aetiology. Most individuals who experience tinnitus do not find it bothersome but a significant  
85 proportion are disturbed by it, often reporting a variety of adverse comorbid associations including  
86 anxiety, depression, disturbed sleep, or concentration difficulties[3–5]. Concentration difficulties can  
87 be conceptualised as failures of cognitive performance expressed behaviourally (sometimes called  
88 objective cognition[6]) in various domains such as attention and memory[7,8]. Previous research has  
89 implicated tinnitus as negatively impacting cognitive performance in domains including executive  
90 functions, attention and working memory [9–11].Furthermore, a link between subjective perception of  
91 cognitive performance, or subjective cognitive complaints (SCC), has also been suggested [12].  
92 Investigating the potential impact of tinnitus on cognitive performance is further complicated by the  
93 strong associations that tinnitus shares with depression and anxiety, which can independently  
94 negatively impact cognitive performance [5,13,14].

95 Several reviews have explored the relationship between tinnitus and cognition generally  
96 [12,15–17]. We note that all of these are narrative reviews; no review has quantitatively synthesised  
97 the literature specifically concerning tinnitus and behaviourally measured cognitive performance. An  
98 overview of previous reviews and their methodologies is provided in Table 1.

99 *Table 1. Overview of previous reviews investigating cognition and tinnitus*

| Study                        | Databases searched                      | Example search strategy provided                                                                                                                                                                                                        | Number of records retrieved during database search | Number of studies included in review | Synthesis of association between cognition and tinnitus                                                                                                                                                                                   |
|------------------------------|-----------------------------------------|-----------------------------------------------------------------------------------------------------------------------------------------------------------------------------------------------------------------------------------------|----------------------------------------------------|--------------------------------------|-------------------------------------------------------------------------------------------------------------------------------------------------------------------------------------------------------------------------------------------|
| Trevis et al. (2018)         | PsycINFO, MedLine                       | (1) tinnitus AND psych* (all fields), (2) tinnitus AND mood (all fields), (3) tinnitus AND depress* (all fields), (4) tinnitus AND anx* OR stress (all fields)                                                                          | 725                                                | 35                                   | Meta-analysis of 'psychological functioning' in tinnitus participants. Narrative review of association between 'cognitive functioning' (n = 16); i.e. behavioural cognitive task performance and chronic tinnitus. awareness and severity |
| Mohamad et al. (2016)        | PubMed                                  | (((tinnitus[Title]) AND cogniti*[Title])) OR ((tinnitus[Title]) AND attention[Title])) OR ((tinnitus[Title]) AND memory[Title])                                                                                                         | 65                                                 | 9                                    | Narrative review of 'behavioural research' addressing the impact of tinnitus and its severity of various aspects of cognitive performance in domains of working memory and attention.                                                     |
| Tegg-Quinn et al. (2016)     | PubMed, MedLine, CINAHL, SCOPUS, EMBASE | (tinnitus) and (cognition OR memory OR attention OR concentration OR cognitive function OR mental activity) NOT (infant OR child OR adolescent OR paediatric OR animal OR balance OR hyperacusis OR implant OR pharmaceutical OR drugs) | 2236                                               | 18                                   | Narrative review of behavioural cognitive tasks, electrophysiological correlates of cognition and self-reported cognitive function measures.                                                                                              |
| Andersson and McKenna (2006) | MedLine and Psychological Abstracts     | Not reported                                                                                                                                                                                                                            | Not reported                                       | Not reported                         | Narrative review of 'cognitive deficits' (i.e. behavioural cognitive tasks), 'cognitive bias and 'conscious appraisal of tinnitus'.                                                                                                       |

100

101

1  
2  
3 102 Andersson and McKenna [15] were the first to review the relationship between cognition and  
4 103 tinnitus, detailing three separate but related lines of cognitive research. The strands of research  
5 104 included neuropsychological studies involving attention, cognitive bias (concerning selective attention  
6 105 and memory) and appraisal (i.e. conscious recollection) of tinnitus. Tegg-Quinn et al. [16] performed  
7 106 a systematic review of all studies pertaining to the impact of tinnitus upon cognition in adults. The  
8 107 review described studies that included behavioural, electrophysiological and SCC measures. The  
9 108 authors concluded that tinnitus impairs cognition by adversely impacting the executive control of  
10 109 attention. Mohamad et al. [12] performed a narrative review of the behavioural evidence concerning  
11 110 the consequences of tinnitus and its severity on cognition. They concluded that there was suggestive  
12 111 evidence for tinnitus being associated with poorer performance in behavioural tasks attempting to  
13 112 measure executive attention, selective attention and working memory. This review also examined the  
14 113 proposed relationship between cognitive performance and SCC in individuals with tinnitus. They  
15 114 reported that their data was insufficient to form conclusions and recommended further investigation of  
16 115 the relationship. Trevis et al.[17] performed a systematic review and meta-analysis of psychological  
17 116 functioning in chronic tinnitus. The authors predominantly investigated the presence and severity of  
18 117 tinnitus in relation to emotional wellbeing through meta-analysis, while cognitive function (i.e.  
19 118 cognitive performance) was described through a narrative review. To summarise, the collective  
20 119 conclusions of these reviews describe mixed evidence in support of the hypothesis that tinnitus  
21 120 adversely impacts cognitive performance and individually included insufficient data to form  
22 121 conclusions regarding associations between cognitive performance and SCC in individuals with  
23 122 tinnitus. Several distinct cognitive functions have been implicated in this hypothesis. Previous studies  
24 123 have suggested that structures relating to auditory attention and efferent structures within the  
25 124 subcallosal region are mechanistically involved in the adverse impacts of tinnitus on cognitive  
26 125 performance [16]. Functional disruption to large scale neurocognitive networks has also been  
27 126 suggested as a mechanism [17,18] ; specifically, a hypoactive cognitive control network and  
28 127 hyperactive 'default mode' or 'task-negative' network.

31 128 Of the recent reviews that discuss cognitive performance via behavioural measures in tinnitus  
32 129 participants, there is a notable lack of overlap in the studies that met criteria for inclusion in the final  
33 130 reviews; e.g. Mohamad et al.[10 ] reviewed nine studies and Trevis et al.[17] reviewed a total of  
34 131 thirty-five studies (with sixteen of these concerning cognitive performance), however, only three  
35 132 studies were included in both reviews. Therefore, previous work has essentially investigated the  
36 133 association between tinnitus and cognitive performance with different datasets. Schultz et al. [19]  
37 134 recently reviewed the evidence for tinnitus impacting neurocognitive profiles following traumatic  
38 135 brain injury. They discuss cognitive performance through selective discussion of aforementioned  
39 136 reviews - except Andersson and Mckenna [15] – and subsequent implications within a medicolegal  
40 137 context. The authors highlight the current lack of and need for empirical investigation of the  
41 138 association between tinnitus and cognitive performance through meta-analysis. Like any statistical

1  
2  
3 139 technique, meta-analysis is only as robust as the data that is inputted. It is, therefore, essential to  
4 140 include as much relevant data as possible - through a comprehensive search strategy - to ensure that  
5 141 conclusions are based on all evidence for an effect of tinnitus on specific cognitive domains.

7 142 Tinnitus is a symptom of heterogeneous and often unknown aetiologies. It is, therefore,  
8 143 inherently difficult to define and specify within the context of a systematic review. Different inclusion  
9 144 criteria and working definitions of tinnitus are likely to significantly influence the records included  
10 145 within a review. For example, Trevis et al.[17] defined 'chronic tinnitus' as participants who had  
11 146 experienced tinnitus for at least one month. An alternative approach would be to not attempt to  
12 147 temporally specify a population, but rather investigate this variable through further quantitative  
13 148 analysis if feasible. With regards to domains of cognitive performance, the aforementioned reviews  
14 149 have implicated tinnitus as impacting executive attention, although the evidence is not conclusive:  
15 150 additional domains of cognitive performance are also potentially associated with tinnitus, including  
16 151 selective attention, working memory and processing speed [12,15–17]. A promising approach to  
17 152 foster empirically valid insights into any association between cognition and tinnitus is through  
18 153 evaluating and categorising tests of cognitive performance according to the theoretical constructs that  
19 154 they are thought to measure [20]. Webb et al. [21] describe a cross-disciplinary taxonomy for  
20 155 categorising cognitive performance measures (CHC-M). It utilises combined Cattell-Horn-Carroll  
21 156 (CHC) and Miyake theoretical elements [22,23] and includes a comprehensive taxonomical  
22 157 categorisation of cognitive tasks. CHC-M taxonomy will be used to organise synthesis when  
23 158 investigating the association between tinnitus and cognitive performance. This approach has several  
24 159 benefits: it is informed by the CHC 'three strata' model of cognition, which has been empirically  
25 160 validated through decades of research; it incorporates executive functions, a cognitive construct of  
26 161 particular clinical interest, facilitating translation to the clinical domain; utilisation of a pre-existing  
27 162 taxonomy minimises author bias (as outcome measures are not being subjectively assigned to domains  
28 163 of cognitive performance by authors) and enables comparison compared to 'categorisation as usual';  
29 164 finally, the taxonomy provides a clear framework around which to structure synthesis of results.  
30 165 Associations between categorised measures of cognitive performance and tinnitus may then be  
31 166 subjected to meta-analysis of specific cognitive domains in order to understand which are associated  
32 167 with tinnitus, as well as the best estimate of any such effect. Given the suggestive nature of the  
33 168 evidence provided in previous reviews, we can hypothesise that there will be negative associations  
34 169 between tinnitus severity and cognitive performance in the broad stratum domains of executive  
35 170 functions, processing speed, and general short-term memory. To summarise, although several authors  
36 171 have reviewed the association between tinnitus and cognitive performance assessed through  
37 172 behavioural measures, these have been via narrative syntheses. They have discussed different sets of  
38 173 studies, derived from different search strategies in the absence of a unifying taxonomy. A  
39 174 comprehensive, quantitative investigation of the association between tinnitus and cognitive



1  
2  
3 175 performance, building on earlier efforts in this field and exploring the underlying theoretical domains  
4 176 of cognition involved, is therefore both necessary and timely.

5 177 The primary aim of this work is to comprehensively review the literature and synthesize  
6 178 relevant data to determine the associations between tinnitus and cognitive task performance in adults.  
7 179 If possible, a secondary examination of patient characteristics (e.g. age or gender) or commonly used  
8 180 patient-reported outcomes (e.g. depression or anxiety) and their influence on any association between  
9 181 tinnitus and cognitive performance will also be conducted.  
10  
11  
12  
13  
14  
15

## 16 184 **Methods and Analysis**

17 185 The methodology of this review is reported in accordance with the Preferred Reporting Items for  
18 186 Systematic Reviews and Meta-Analysis Protocols (PRISMA-P) checklist [24]. Specified roles of  
19 187 named authors are identified throughout the review protocol.  
20  
21  
22  
23

### 24 189 **Eligibility criteria**

25 190 Only published or in-press, peer-reviewed journal articles will be considered. Articles that are not  
26 191 written in English or have no English language translation available will be excluded as the review  
27 192 team does not have resource available to support translation. No date restriction will be applied.  
28  
29  
30

31 194 Review inclusion criteria are specified according to Participant, Intervention (or Interest),  
32 195 Comparator, Outcome and Setting (PICOS) characteristics.  
33  
34  
35

36 197 *Participants:* Studies including adults ( $\geq 18$  years) with tinnitus. Studies that include both children  
37 198 ( $< 18$  years) and adults will be excluded, unless the adult data are reported separately.  
38  
39

40 200 *Intervention/Interest:* Tinnitus (via self-report, tinnitus severity scale, item or established tinnitus  
41 201 questionnaires).  
42  
43  
44

45 203 *Comparator:* A minimum of one established measure of cognitive performance (behavioural or self-  
46 204 report).  
47  
48

49 206 *Outcome measures:* An association between tinnitus and cognitive performance. Where available,  
50 207 data for associations between tinnitus and additional potential moderator variables will be extracted,  
51 208 such as measures of anxiety or depression.  
52  
53  
54  
55  
56  
57  
58  
59  
60



1  
2  
3 210 *Study design:* Cross-sectional, longitudinal, experimental, quasi-experimental and observational study  
4 211 designs will be included (only baseline data will be extracted where multiple timepoint measurements  
5 212 are made).

6  
7 213

#### 8 214 **Patient and Public Involvement**

9  
10 215 There was no patient or public involvement in the development of this manuscript.

11  
12 216

#### 13 217 **Information Sources and Search strategy**

14 218 A systematic search strategy will be employed to identify completed, peer-reviewed journal articles  
15 219 from the following bibliographic databases: MEDLINE (via Ovid SP), EMBASE (via Ovid SP),  
16 220 PsycINFO (via Ovid SP), ASSIA (via ProQuest), CINAHL (via EBSCO Host), Scopus, PubMed, and  
17 221 Web of Science (Science and Social Science Citation Index). Initial searches were performed in  
18 222 February 2018. Update searches will be conducted shortly before manuscript submission.

19 223 The search terms to be used in this systematic review were identified using free text,  
20 224 controlled vocabularies (i.e. Medical Subject Headings - MeSH and CINAHL Headings), literature  
21 225 review, opinion of authors and scrutiny of test search results. The following search strategy will be  
22 226 used for PubMed, which will then be adapted for other databases to be searched:

23 227 (“tinnitus”[MeSH] OR “tinnitus”[tiab] OR “phantom sound\*”[tiab] OR “ringing”[tiab] OR  
24 228 “buzzing”[tiab]) AND (“cognition”[MeSH] OR “cogniti\*”[tiab] OR “memory”[tiab] or  
25 229 “attention\*”[tiab] OR “executive”[tiab])

26  
27  
28  
29  
30  
31  
32 230

#### 33 231 **Data management**

34 232 NAC will be responsible for data management. Covidence online systematic review software  
35 233 (<https://www.covidence.org>) will be used for article screening and data management throughout the  
36 234 review. All articles identified through the search process will be recorded digitally and will be  
37 235 trackable through the data screening and extraction processes. Articles excluded at the full text  
38 236 screening stage will have justification for exclusion noted. Included articles will be assigned a unique  
39 237 study identification code, enabling it to be linked to its corresponding full text and data collection  
40 238 sheet.

41  
42 239

#### 43 240 **Article selection process**

44 241 NAC, DJH, and MAA will independently screen titles and abstracts of records retrieved from  
45 242 searches such that all records are independently screened by two reviewers. Records that meet the  
46 243 specified inclusion criteria will then be taken forward to full text screening, as well as records where  
47 244 there is too little information available to make a decision to exclude. All full texts selected will be  
48 245 independently screened by two reviewers who will resolve any discrepancies in which records are

1  
2  
3 246 included. Where discrepancies for inclusion are not resolved by the two reviewers, a third reviewer  
4 247 will adjudicate. If necessary, study authors will be contacted to request additional information that  
5 248 may help ascertain suitability for inclusion.  
6  
7 249

### 9 250 **Data extraction process**

10 251 Data extraction will be performed using a customised form via Covidence. Relevant guidance notes  
11 252 will be created and disseminated to review team members by NAC prior to commencement. The data  
12 253 form and guidance notes will be piloted by NAC and HH. All included records will be subject to data  
13 254 extraction. Data from each included record will be extracted independently by two reviewers and the  
14 255 results compared. Any disagreements arising will be resolved through discussion or the involvement  
15 256 of a third reviewer.  
16  
17 257

### 18 258 **Data items**

19 259 The data collection form will include various fields corresponding to study type, population, reported  
20 260 effect size, and any other relevant study findings. Study authors will be contacted and if there are  
21 261 relevant missing data. This will entail one email reminder, with instances of no response being  
22 262 reported as such. Data will be approximated from figures for instances where it can only be estimated,  
23 263 using software such as WebPlotDigitizer (<http://arohatgi.info/WebPlotDigitizer/app/>). Disagreements  
24 264 regarding numerical data extracted from figures will be discussed by investigators and/or resolved by  
25 265 averaging.  
26  
27 266

### 28 267 **Risk of bias in individual studies**

29 268 NAC, HH, and DJH (two reviewers per record) will independently assess the risk of bias using the  
30 269 Weight of Evidence (WoE) framework, which allows appraisal of study criteria that is tailored to the  
31 270 review question [25,26]. The WoE framework will be customised and used to evaluate  
32 271 *Methodological Quality* (WoE A), *Methodological Relevance* (WoE B), and *Topic*  
33 272 *Relevance* (WoE C). A rating of low, medium, or high will be assigned for each category in  
34 273 accordance with WoE framework criteria. Disagreements regarding bias appraisal will be resolved  
35 274 through discussion or the involvement of a third reviewer.  
36  
37 275

### 38 276 **Data synthesis**

39 277 The effect of interest is the association between tinnitus and measures of cognitive performance  
40 278 expressed as correlation. Where possible, results not expressed as correlations (e.g. mean differences  
41 279 between groups) will be calculated as appropriate correlations, such as point-biserial or polyserial  
42 280 correlation coefficients.[27] Bias corrections will be applied to all derived correlation coefficients  
43 281 prior to pooling [28]. Where possible, missing effect sizes will be calculated from reported test  
44  
45  
46  
47  
48

1  
2  
3 282 statistics such as standard deviations or t-values [27]. Narrative synthesis will be undertaken for  
4 283 records where appropriate effect sizes cannot be obtained. If SCC measures assess comparable  
5 284 constructs, a separate meta-analysis will be undertaken for the association between tinnitus and SCC.  
6  
7 285 If not, these studies will be synthesised narratively. Cognitive performance will be collapsed over  
8  
9 286 'broad' factors within the level '2' stratum to enable meta-analysis of the association between tinnitus  
10  
11 287 and cognitive performance these domains. If possible, 'narrow' factors within 'level 3' stratum will be  
12  
13 288 meta-analysed, however, if too few records are included to afford this degree of granulation, then the  
14  
15 289 narrow factors will provide a framework for narrative synthesis.  
16  
17 290

291

### 292 **Assessment of heterogeneity**

18  
19 293 The ratio of observed variation to within-study variance will be assessed with the Q-statistic, used to  
20  
21 294 test the null hypothesis of homogeneity of effect sizes. The  $I^2$  statistic will provide a further index of  
22  
23 295 heterogeneity across studies. If the apparent heterogeneity across studies exceeds 50%, potential  
24  
25 296 causes of heterogeneity will be explored through subgroup analysis. The Tau-squared statistic will  
26  
27 297 also be used to assess the amount of heterogeneity where a random-effects model is fitted to the data.  
28  
29 298 A Baujat plot will be used as a graphical means of identifying studies that contribute excessively to  
30  
31 299 any observed heterogeneity and also provide insight into potential moderating variables that  
32  
33 300 contribute to heterogeneity across studies [29].  
34

301

### 302 **Subgroup analyses**

35 303 Potential contributors to heterogeneity across studies will be explored through subgroup analysis (i.e.  
36  
37 304 sensitivity analyses, moderator analysis or meta-regression). *A priori* variables of interest for  
38  
39 305 subgroup analyses will include tinnitus sample characteristics (duration, laterality, intermittency),  
40  
41 306 study quality and variables known to adversely impact cognitive performance, including sample age,  
42  
43 307 presence of hearing impairment, presence of anxiety or depression, reported medication usage and  
44  
45 308 visual acuity. Additional potential moderating variables may be identified after reviewing the  
46  
47 309 literature and will be documented accordingly.  
48

310

311

### 312 **Assessment of reporting bias**

49 313 The influence of reporting bias through potentially unpublished results (i.e. publication bias) will be  
50  
51 314 explored via funnel plots, rank correlation test and/or Egger's regression test.  
52

315

### 316 **Ethics and dissemination**

1  
2  
3 317 No ethical issues are foreseen in this systematic review. Reports will be guided by the Preferred  
4 318 Reporting Items for Systematic Reviews and Meta-Analysis guidelines [30]. Various dissemination  
5 319 strategies will be employed, that will likely include: journal article and PhD thesis (NAC) made  
6 320 available via an institutional repository, results being reported at national and international academic  
7 321 conferences, and public and patient engagement (e.g. articles written for relevant non-specialist  
8 322 audiences).

9 323

10 324

### 11 325 **Summary**

12 326 A protocol is described for a systematic review and meta-analysis to determine a best estimate of the  
13 327 association between tinnitus and cognitive performance in adults. The relationship between tinnitus,  
14 328 cognitive performance, and SSC will also be examined. To date, no review has comprehensively  
15 329 explored the veracity of an association between tinnitus and cognitive performance through  
16 330 application of quantitative analyses of all available peer-reviewed data. The outlined approach will  
17 331 facilitate an understanding of the potential impact of tinnitus upon cognitive performance,  
18 332 underpinned by relevant cognitive theory. An increased understanding of the relationship between  
19 333 tinnitus and cognitive performance will eventually improve tinnitus sub-typing and inform therapeutic  
20 334 methods[31–34] for example, it may be possible to deliver cognitive training paradigms in a targeted  
21 335 manner.

22 336

### 23 337 **Acknowledgements**

24 338 Thanks to Oliver Zobay for statistical advice.

25 339

26 340

### 27 341 **References**

28 342

- 29 343 1 Sedley W, Friston KJ, Gander PE, *et al.* An Integrative Tinnitus Model Based on Sensory  
30 344 Precision. *Trends Neurosci* 2016;**39**:799–812. doi:10.1016/j.tins.2016.10.004
- 31 345 2 Møller AR, Langguth B, DeRidder D, *et al.* *Textbook of Tinnitus*. Springer Science & Business  
32 346 Media 2010. <https://market.android.com/details?id=book-YStcWFsxQZEC>
- 33 347 3 Tyler RS, Baker LJ. Difficulties experienced by tinnitus sufferers. *J Speech Hear Disord*  
34 348 1983;**48**:150–4. doi:10.1044/jshd.4802.150
- 35 349 4 Andersson G, Lyttkens L, Larsen HC. Distinguishing levels of tinnitus distress. *Clin Otolaryngol*  
36 350 *Allied Sci* 1999;**24**:404–10.
- 37 351 5 Bhatt JM, Bhattacharyya N, Lin HW. Relationships between tinnitus and the prevalence of  
38 352 anxiety and depression. *Laryngoscope* 2017;**127**:466–9. doi:10.1002/lary.26107

- 1  
2  
3 353 6 Srisurapanont M, Suttajit S, Eurviriyankul K, *et al.* Discrepancy between objective and  
4 354 subjective cognition in adults with major depressive disorder. *Sci Rep* 2017;**7**:3901.  
5 355 doi:10.1038/s41598-017-04353-w
- 6  
7 356 7 Petersen SE, Posner MI. The attention system of the human brain: 20 years after. *Annu Rev*  
8 357 *Neurosci* 2012;**35**:73–89. doi:10.1146/annurev-neuro-062111-150525
- 9  
10 358 8 Baddeley A. Working memory. *Curr Biol* 2010;**20**:R136-40. doi:10.1016/j.cub.2009.12.014
- 11  
12 359 9 Hallam RS, McKenna L, Shurlock L. Tinnitus impairs cognitive efficiency. *Int J Audiol*  
13 360 2004;**43**:218–26.
- 14  
15 361 10 Rossiter S, Stevens C, Walker G. Tinnitus and its effect on working memory and attention. *J*  
16 362 *Speech Lang Hear Res JSLHR* 2006;**49**:150–60. doi:10.1044/1092-4388(2006/012)
- 17  
18 363 11 Heeren A, Maurage P, Perrot H, *et al.* Tinnitus specifically alters the top-down executive control  
19 364 sub-component of attention: evidence from the Attention Network Task. *Behav Brain Res*  
20 365 2014;**269**:147–54. doi:10.1016/j.bbr.2014.04.043
- 21  
22 366 12 Mohamad N, Hoare DJ, Hall DA. The consequences of tinnitus and tinnitus severity on  
23 367 cognition: A review of the behavioural evidence. *Hear Res* 2016;**332**:199–209.  
24 368 doi:10.1016/j.heares.2015.10.001
- 25  
26 369 13 Robinson OJ, Vytal K, Cornwell BR, *et al.* The impact of anxiety upon cognition: perspectives  
27 370 from human threat of shock studies. *Front Hum Neurosci* 2013;**7**:203.  
28 371 doi:10.3389/fnhum.2013.00203
- 29  
30 372 14 Lee RSC, Hermens DF, Porter MA, *et al.* A meta-analysis of cognitive deficits in first-episode  
31 373 Major Depressive Disorder. *J Affect Disord* 2012;**140**:113–24. doi:10.1016/j.jad.2011.10.023
- 32  
33 374 15 Andersson G, McKenna L. The role of cognition in tinnitus. [Review] [32 refs]. *Acta Otolaryngol*  
34 375 *Suppl (Stockh)* 2006;**1**:39–43.
- 35  
36 376 16 Tegg-Quinn S, Bennett RJ, Eikelboom RH, *et al.* The impact of tinnitus upon cognition in adults:  
37 377 A systematic review. *Int J Audiol* 2016;**55**:533–40. doi:10.1080/14992027.2016.1185168
- 38  
39 378 17 Trevis KJ, McLachlan NM, Wilson SJ. A systematic review and meta-analysis of psychological  
40 379 functioning in chronic tinnitus. *Clin Psychol Rev* Published Online First: 2018.  
41 380 doi:10.1016/j.cpr.2017.12.006
- 42  
43 381 18 Trevis KJ, McLachlan NM, Wilson SJ. Cognitive mechanisms in chronic tinnitus: Psychological  
44 382 markers of a failure to switch attention. *Front Psychol* 2016.
- 45  
46 383 19 Schultz IZ, Sepehry AA, Greer SC. Impact of Tinnitus on Cognitive Function in Forensic  
47 384 Neuropsychology Context. *Psychol Inj Law* 2018;:1–9. doi:10.1007/s12207-018-9321-2
- 48  
49 385 20 Dryden A, Allen HA, Henshaw H, *et al.* The Association Between Cognitive Performance and  
50 386 Speech-in-Noise Perception for Adult Listeners: A Systematic Literature Review and Meta-  
51 387 Analysis. *Trends Hear* 2017;**21**:2331216517744675. doi:10.1177/2331216517744675
- 52  
53 388 21 Webb SL, Loh V, Lampit A, *et al.* Meta-Analysis of the Effects of Computerized Cognitive  
54 389 Training on Executive Functions: a Cross-Disciplinary Taxonomy for Classifying Outcome  
55 390 Cognitive Factors. *Neuropsychol Rev* 2018;**28**:232–50. doi:10.1007/s11065-018-9374-8

- 1  
2  
3 391 22 Miyake A, Friedman NP, Emerson MJ, *et al.* The Unity and Diversity of Executive Functions and  
4 392 Their Contributions to Complex “Frontal Lobe” Tasks: A Latent Variable Analysis. *Cogn*  
5 393 *Psychol* 2000;**41**:49–100. doi:10.1006/cogp.1999.0734
- 6  
7 394 23 Jewsbury PA, Bowden SC, Duff K. The Cattell–Horn–Carroll Model of Cognition for Clinical  
8 395 Assessment. *J Psychoeduc Assess* 2016;**35**:547–67. doi:10.1177/0734282916651360
- 9  
10 396 24 Shamseer L, Moher D, Clarke M, *et al.* Preferred reporting items for systematic review and meta-  
11 397 analysis protocols (PRISMA-P) 2015: elaboration and explanation. *BMJ* 2015;**349**:g7647.  
12 398 doi:10.1136/bmj.g7647
- 13  
14 399 25 Gough D. Weight of Evidence: a framework for the appraisal of the quality and relevance of  
15 400 evidence. *Res Pap Educ* 2007;**22**:213–28. doi:10.1080/02671520701296189
- 16  
17 401 26 Weed Douglas L. Weight of Evidence: A Review of Concept and Methods. *Risk Anal*  
18 402 2005;**25**:1545–57. doi:10.1111/j.1539-6924.2005.00699.x
- 19  
20 403 27 Lipsey MW, Wilson DB. *Practical Meta-Analysis*. SAGE Publications 2000.  
21 404 <https://market.android.com/details?id=book-BKVpAAAAMAAJ>
- 22  
23 405 28 Hunter JE, Schmidt FL. *Methods of Meta-Analysis: Correcting Error and Bias in Research*  
24 406 *Findings*. SAGE 2004. <https://market.android.com/details?id=book-kImkui18i94C>
- 25  
26 407 29 Baujat B, Mahé C, Pignon J-P, *et al.* A graphical method for exploring heterogeneity in meta-  
27 408 analyses: application to a meta-analysis of 65 trials. *Stat Med* 2002;**21**:2641–52.  
28 409 doi:10.1002/sim.1221
- 29  
30 410 30 Moher D, Liberati A, Tetzlaff J, *et al.* Preferred reporting items for systematic reviews and meta-  
31 411 analyses: the PRISMA statement. *PLoS Med* 2009;**6**:e1000097.  
32 412 doi:10.1371/journal.pmed.1000097
- 33  
34 413 31 Hoare DJ, Stacey PC, Hall DA. The efficacy of auditory perceptual training for tinnitus: a  
35 414 systematic review. *Ann Behav Med* 2010;**40**:313–24. doi:10.1007/s12160-010-9213-5
- 36  
37 415 32 Baune BT, Renger L. Pharmacological and non-pharmacological interventions to improve  
38 416 cognitive dysfunction and functional ability in clinical depression--a systematic review.  
39 417 *Psychiatry Res* 2014;**219**:25–50. doi:10.1016/j.psychres.2014.05.013
- 40  
41 418 33 Ferguson M, Henshaw H. How Does Auditory Training Work? Joined-Up Thinking and  
42 419 Listening. *Semin Hear* 2015;**36**:237–49. doi:10.1055/s-0035-1564456
- 43  
44 420 34 Barrett DJK, Pilling M. Evaluating the Precision of Auditory Sensory Memory as an Index of  
45 421 Intrusion in Tinnitus. *Ear Hear* 2017;**38**:262–5. doi:10.1097/AUD.0000000000000367

422



## PRISMA-P 2015 Checklist

This checklist has been adapted for use with protocol submissions to *Systematic Reviews* from Table 3 in Moher D et al: Preferred reporting items for systematic review and meta-analysis protocols (PRISMA-P) 2015 statement. *Systematic Reviews* 2015 4:1

| Section/topic                     | #  | Checklist item                                                                                                                                                                                  | Information reported                |                          | Line number(s)   |
|-----------------------------------|----|-------------------------------------------------------------------------------------------------------------------------------------------------------------------------------------------------|-------------------------------------|--------------------------|------------------|
|                                   |    |                                                                                                                                                                                                 | Yes                                 | No                       |                  |
| <b>ADMINISTRATIVE INFORMATION</b> |    |                                                                                                                                                                                                 |                                     |                          |                  |
| <b>Title</b>                      |    |                                                                                                                                                                                                 |                                     |                          |                  |
| Identification                    | 1a | Identify the report as a protocol of a systematic review                                                                                                                                        | <input checked="" type="checkbox"/> | <input type="checkbox"/> | 1                |
| Update                            | 1b | If the protocol is for an update of a previous systematic review, identify as such                                                                                                              | <input type="checkbox"/>            | <input type="checkbox"/> | N/A              |
| <b>Registration</b>               | 2  | If registered, provide the name of the registry (e.g., PROSPERO) and registration number in the Abstract                                                                                        | <input checked="" type="checkbox"/> | <input type="checkbox"/> | 55               |
| <b>Authors</b>                    |    |                                                                                                                                                                                                 |                                     |                          |                  |
| Contact                           | 3a | Provide name, institutional affiliation, and e-mail address of all protocol authors; provide physical mailing address of corresponding author                                                   | <input checked="" type="checkbox"/> | <input type="checkbox"/> | 6-15             |
| Contributions                     | 3b | Describe contributions of protocol authors and identify the guarantor of the review                                                                                                             | <input checked="" type="checkbox"/> | <input type="checkbox"/> | 335              |
| <b>Amendments</b>                 | 4  | If the protocol represents an amendment of a previously completed or published protocol, identify as such and list changes; otherwise, state plan for documenting important protocol amendments | <input type="checkbox"/>            | <input type="checkbox"/> | N/A              |
| <b>Support</b>                    |    |                                                                                                                                                                                                 |                                     |                          |                  |
| Sources                           | 5a | Indicate sources of financial or other support for the review                                                                                                                                   | <input checked="" type="checkbox"/> | <input type="checkbox"/> | 330-334          |
| Sponsor                           | 5b | Provide name for the review funder and/or sponsor                                                                                                                                               | <input checked="" type="checkbox"/> | <input type="checkbox"/> | 330-334          |
| Role of sponsor/funder            | 5c | Describe roles of funder(s), sponsor(s), and/or institution(s), if any, in developing the protocol                                                                                              | <input checked="" type="checkbox"/> | <input type="checkbox"/> | 330-334          |
| <b>INTRODUCTION</b>               |    |                                                                                                                                                                                                 |                                     |                          |                  |
| <b>Rationale</b>                  | 6  | Describe the rationale for the review in the context of what is already known                                                                                                                   | <input checked="" type="checkbox"/> | <input type="checkbox"/> | 33-50, 67-170    |
| <b>Objectives</b>                 | 7  | Provide an explicit statement of the question(s) the review will address with reference to                                                                                                      | <input checked="" type="checkbox"/> | <input type="checkbox"/> | 167-170, 183-201 |

| Section/topic                             | #   | Checklist item                                                                                                                                                                                                                              | Information reported                |                          | Line number(s)   |
|-------------------------------------------|-----|---------------------------------------------------------------------------------------------------------------------------------------------------------------------------------------------------------------------------------------------|-------------------------------------|--------------------------|------------------|
|                                           |     |                                                                                                                                                                                                                                             | Yes                                 | No                       |                  |
|                                           |     | participants, interventions, comparators, and outcomes (PICO)                                                                                                                                                                               |                                     |                          |                  |
| <b>METHODS</b>                            |     |                                                                                                                                                                                                                                             |                                     |                          |                  |
| <b>Eligibility criteria</b>               | 8   | Specify the study characteristics (e.g., PICO, study design, setting, time frame) and report characteristics (e.g., years considered, language, publication status) to be used as criteria for eligibility for the review                   | <input checked="" type="checkbox"/> | <input type="checkbox"/> | 183-201          |
| <b>Information sources</b>                | 9   | Describe all intended information sources (e.g., electronic databases, contact with study authors, trial registers, or other grey literature sources) with planned dates of coverage                                                        | <input checked="" type="checkbox"/> | <input type="checkbox"/> | 207-215          |
| <b>Search strategy</b>                    | 10  | Present draft of search strategy to be used for at least one electronic database, including planned limits, such that it could be repeated                                                                                                  | <input checked="" type="checkbox"/> | <input type="checkbox"/> | 216-218          |
| <b>STUDY RECORDS</b>                      |     |                                                                                                                                                                                                                                             |                                     |                          |                  |
| Data management                           | 11a | Describe the mechanism(s) that will be used to manage records and data throughout the review                                                                                                                                                | <input checked="" type="checkbox"/> | <input type="checkbox"/> | 220-227          |
| Selection process                         | 11b | State the process that will be used for selecting studies (e.g., two independent reviewers) through each phase of the review (i.e., screening, eligibility, and inclusion in meta-analysis)                                                 | <input checked="" type="checkbox"/> | <input type="checkbox"/> | 229-237          |
| Data collection process                   | 11c | Describe planned method of extracting data from reports (e.g., piloting forms, done independently, in duplicate), any processes for obtaining and confirming data from investigators                                                        | <input checked="" type="checkbox"/> | <input type="checkbox"/> | 239-245          |
| <b>Data items</b>                         | 12  | List and define all variables for which data will be sought (e.g., PICO items, funding sources), any pre-planned data assumptions and simplifications                                                                                       | <input checked="" type="checkbox"/> | <input type="checkbox"/> | 247-254, 292-298 |
| <b>Outcomes and prioritization</b>        | 13  | List and define all outcomes for which data will be sought, including prioritization of main and additional outcomes, with rationale                                                                                                        | <input checked="" type="checkbox"/> | <input type="checkbox"/> | 266-278, 292-298 |
| <b>Risk of bias in individual studies</b> | 14  | Describe anticipated methods for assessing risk of bias of individual studies, including whether this will be done at the outcome or study level, or both; state how this information will be used in data synthesis                        | <input checked="" type="checkbox"/> | <input type="checkbox"/> | 257-263          |
| <b>DATA</b>                               |     |                                                                                                                                                                                                                                             |                                     |                          |                  |
| <b>Synthesis</b>                          | 15a | Describe criteria under which study data will be quantitatively synthesized                                                                                                                                                                 | <input checked="" type="checkbox"/> | <input type="checkbox"/> | 265-278          |
|                                           | 15b | If data are appropriate for quantitative synthesis, describe planned summary measures, methods of handling data, and methods of combining data from studies, including any planned exploration of consistency (e.g., $I^2$ , Kendall's tau) | <input checked="" type="checkbox"/> | <input type="checkbox"/> | 265-289          |
|                                           | 15c | Describe any proposed additional analyses (e.g., sensitivity or subgroup analyses, meta-                                                                                                                                                    | <input checked="" type="checkbox"/> | <input type="checkbox"/> | 291-298          |



| Section/topic                            | #   | Checklist item                                                                                                              | Information reported                |                          | Line number(s) |
|------------------------------------------|-----|-----------------------------------------------------------------------------------------------------------------------------|-------------------------------------|--------------------------|----------------|
|                                          |     |                                                                                                                             | Yes                                 | No                       |                |
|                                          |     | regression)                                                                                                                 |                                     |                          |                |
|                                          | 15d | If quantitative synthesis is not appropriate, describe the type of summary planned                                          | <input checked="" type="checkbox"/> | <input type="checkbox"/> | 271-278        |
| <b>Meta-bias(es)</b>                     | 16  | Specify any planned assessment of meta-bias(es) (e.g., publication bias across studies, selective reporting within studies) | <input checked="" type="checkbox"/> | <input type="checkbox"/> | 302-303        |
| <b>Confidence in cumulative evidence</b> | 17  | Describe how the strength of the body of evidence will be assessed (e.g., GRADE)                                            | <input checked="" type="checkbox"/> | <input type="checkbox"/> | 257-263        |
